# Supplementary material for: RPS27, a sORF-Encoded Polypeptide, Functions Antivirally by Activating the NF-κB Pathway and Interacting With Viral Envelope Proteins in Shrimp
Source: PubMed Central journal article supplement (PMC6928191; doi:10.3389/fimmu.2019.02763), 2019-12-17
Supplement: Data_Sheet_1.pdf [file Data_Sheet_1.pdf]

Supplementary information for

**RPS27, a sORF-encoded polypeptide functions antivirally by activating NF- $\kappa$ B pathway and interacting with viral envelope proteins in shrimp**

Meng-Qi Diao<sup>1#</sup>, Cang Li<sup>1</sup>, Ji-Dong Xu<sup>1</sup>, Xiao-Fan Zhao<sup>1</sup>, Jin-Xing Wang<sup>1,2,\*</sup>

1. Shandong Provincial Key Laboratory of Animal Cells and Developmental Biology, School of Life Science, Shandong University, Qingdao 266237, Shandong, China.

2. State Key Laboratory of Microbial Technology, Shandong University, Qingdao, China; Laboratory for Marine Biology and Biotechnology, Qingdao National Laboratory for Marine Science and Technology, Qingdao 266237, Shandong, China.

Corresponding author:

Jin-Xing Wang

Email: jxwang@sdu.edu.cn

# Present address:

Shandong Academy of Pharmaceutical Sciences, Key Laboratory of Biopharmaceuticals, Engineering Laboratory of Polysaccharide drugs, National-Local Joint Engineering Laboratory of Polysaccharide drugs, Postdoctoral Scientific Research Workstation, Jinan, 250101, Shandong, China

## Materials and methods

### RNA Interference Assay for Analyzing Specific mRNA Silencing of *MjRPS27*

Double-stranded *MjRPS27* synthesis and RNA Interference (RNAi) assays were conducted as in our previous report [1]. To test the specificity of *MjRPS27* knockdown in RNAi, we detected expression of several related or unrelated genes by qPCR after *dsMjRPS27* injection with related primers (Table S1). We selected the ribosomal protein S28 (*MjRPS28*) as a related gene; and a transcription factor gene, FOXO, and other unrelated genes, such as a G protein-coupled receptor with methuselah domain (*MjMthGPCR*), a serine/threonine-protein kinase (*MjAKT*) and two small GTPases (*MjRab5* and *MjRab7*) for expression analysis in hemocytes and intestine.

## Results:

1. The nucleotide sequence and predicted amino acid sequence of *MjRPS27*.

```
1   ctcgaaatttcacaaacaaaatcaaaatgaaaaatcataacgtcgccatattaaccaatcg
61  ataaaaatcaacacgcacatgcgctataacaaccagaaaaataaaaacaacacaaaaaga
121  gcacctaaagcccaaaacgtggcgtaaatcgccacctaacgagatctataaaggttgc
181  gcatcccagcgtactttgttactggaggacgaagtttagctcttttcggccgttctcgg
241  attaagatcaacatgcctctcgcaaaagatttacttcatccctcacctgctgaggagaag
1           M P L A K D L L H P S P A E E K
301  aagaaatgcaagctcaaacgccttgtgcagcaccacaaactcctacttcatggatgtaag
16   K K C K L K R L V Q H P N S Y F M D V K
361  tgccctggctgcttcaagatttccacagttttctcccacgccagacagtagtagcatgt
36   C P G C F K I S T V F S H A Q T V V A C
421  gtaggctgtgcaacagttctatgccagcctactggtgggaaggctaagcttacagatgga
56   V G C A T V L C Q P T G G K A K L T D G
481  tgttcattcagaaggaagcagaactaagtgggagagaaaaatgcacctcccagtgtagac
76   C S F R R K Q N -
541  taaatatcctgtcgctatgtaacctagacagcattaaagatcccactgagaggttgatat
601  ttgttttattacgttcaactttctaaggaataaatagctttaatgttgcggaagtcaccg
661  tgttagctttttgtcaaaagttttgtactttttgaaaggaataaatgtctgcattgtagt
721  ggactttaattgtacaaaaggctgtttgtaaggaaaagtctgtaatgggaatatatatt
```

**Figure S1. The nucleotide sequence and predicted amino acid sequence of *MjRPS27*.** The shaded part is the zinc finger domain.

## 2. Alignment and Phylogenetic analysis of RPS27

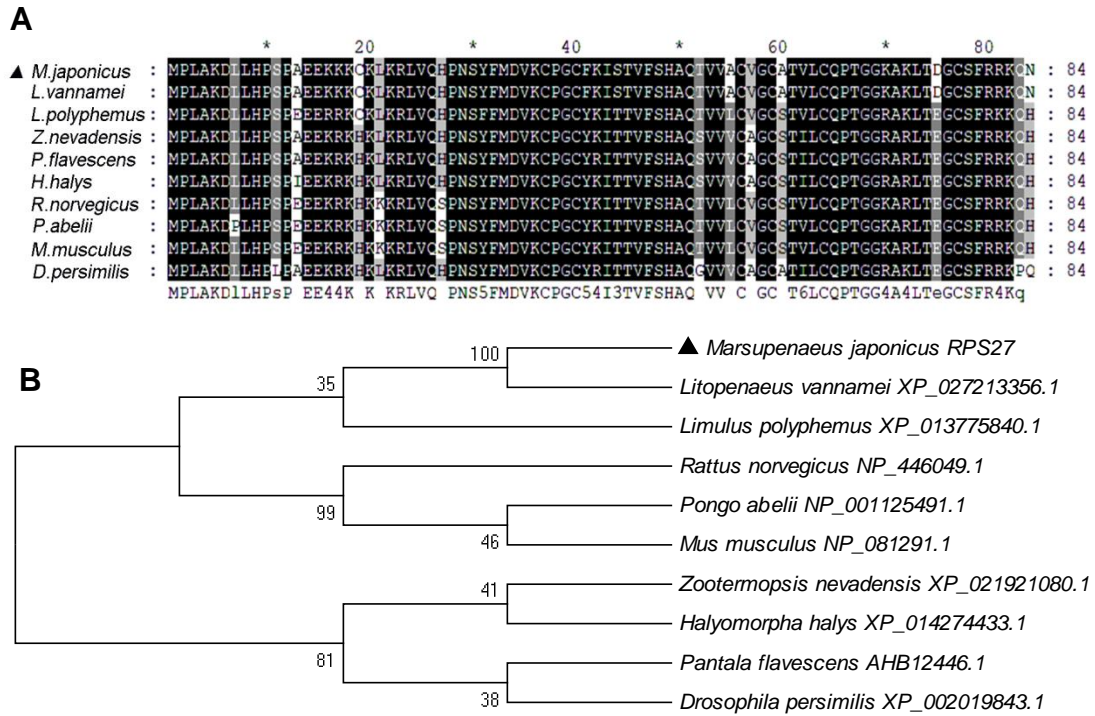

**Figure S2. A, Sequence Alignment of *MjRPS27* with RPS27s from other species. B, Phylogenetic tree of *MjRPS27* and RPS27s from other species.**

## 3. Specific mRNA silencing of *MjRPS27*

To analyze whether the *MjRPS27* RNAi present non-specific silencing, we detected the expression of several genes by qPCR after *dsMjRPS27* injection in hemocytes and intestines of shrimp, including related gene *MjRPS28*, transcription factor genes, *MjDorsal*, *MjRelish* and *MjFOXO*, and other unrelated genes, such as *MjMthGPCR*, *MjAKT* and two small GTPases (*MjRab5* and *MjRab7*), and an AMP gene (*MjALF-B1*) with the primers list in Table S1.

The results showed that *MjRPS27* was successfully knocked down in hemocytes and intestine after *dsMjRPS27* injection (Figure S3 A and D). After knockdown of *MjRPS27*, we firstly analyze the expression of *MjDorsal*, *MjRelish* and *MjALF-B1*, their expression was declined significantly, suggesting that *MjRPS27* was related with

NF- $\kappa$ B pathway. To test if the *MjRPS27* knockdown is specific, we analyzed the expression of *MjRPS28*, and the results revealed that its expression was not altered comparing with the control in hemocytes and intestine of the shrimp (Figure S3C, F). Similar results were obtained for transcription factor *MjFOXO*, and other unrelated genes, *MjMthGPCR*, *MjRab5* and *MjRab7* (Figure S3C, F) in hemocytes and intestine. These results suggested that there was no non-specific silencing of the gene after injection of dsRNA of *MjRPS27*.

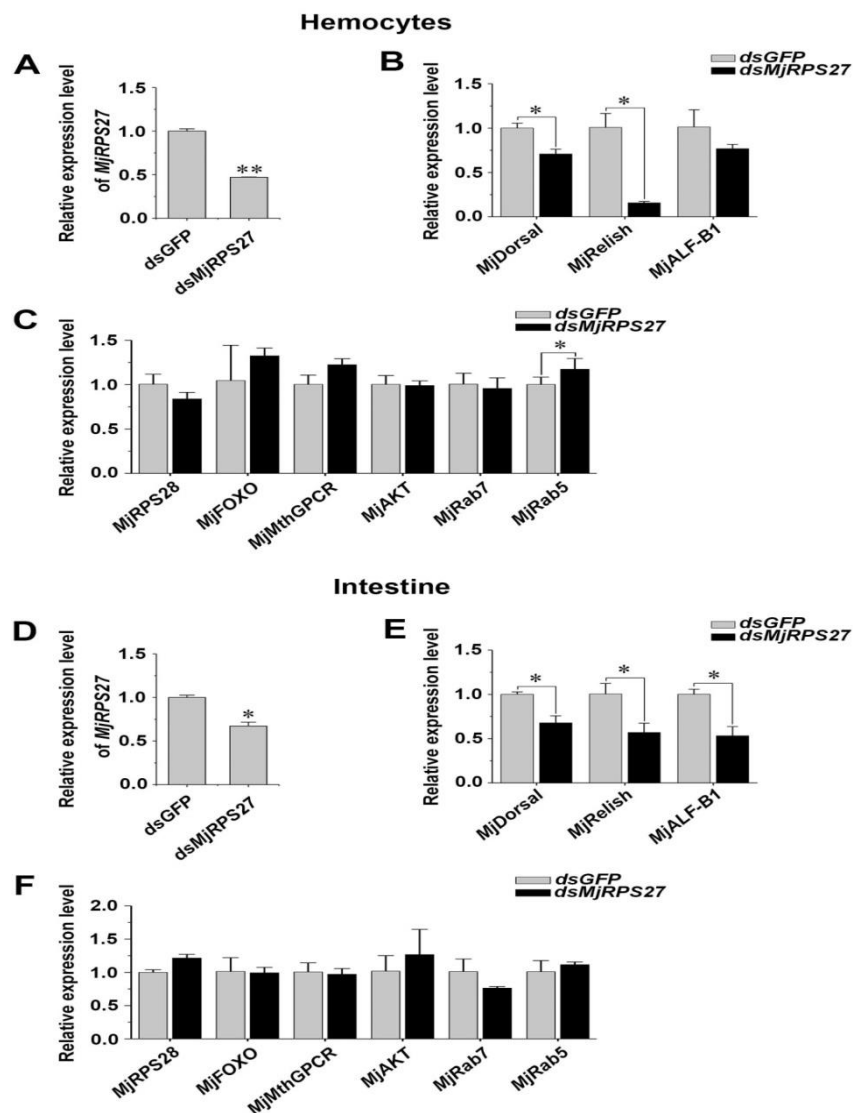

**Fig. S3 Specific knockdown analysis of *MjRPS27* RNAi.** (A) RNAi efficiency of *dsMjRPS27* injection in hemocytes of shrimp. (B) Expression analysis of *MjDorsal*, *MjRelish* and *MjALF-B1* in hemocytes of *MjRPS27*-knockdown shrimp. (C) Expression

analysis of *MjRPS28*, *MjFOXO*, *MjMthGPCR*, *MjRab5* and *MjRab7* in hemocytes of *MjRPS27*-knockdown shrimp. Their expressions were not changed comparing with controls. **(D)** RNAi efficiency of *dsMjRPS27* injection in intestine of shrimp. **(E)** Expression analysis of *MjDorsal*, *MjRelish* and *MjALF-B1* in intestine of *MjRPS27*-knockdown shrimp. **(F)** Expression analysis of *MjRPS28*, *MjFOXO*, *MjMthGPCR*, *MjRab5* and *MjRab7* in intestine of *MjRPS27*-knockdown shrimp. Their expressions were not altered comparing with controls.

#### 4. Interaction analysis of *MjRPS27* and VP26

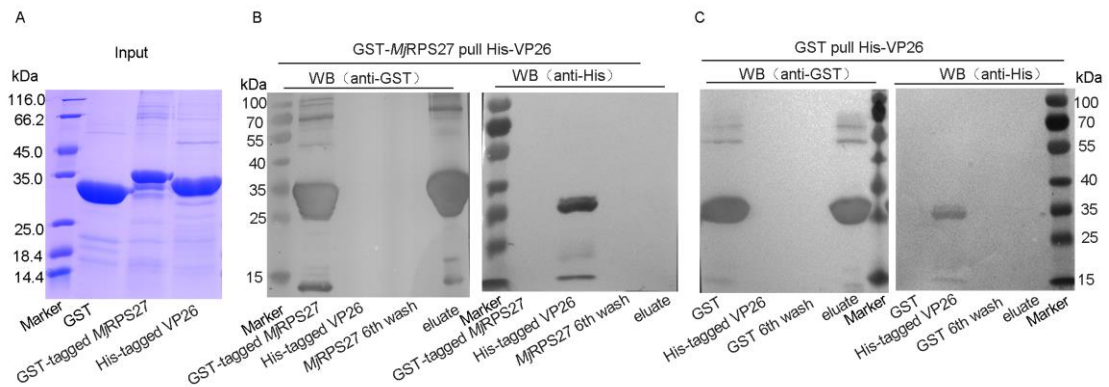

**Figure S4 *MjRPS27* was not interacted with VP26 analyzed by GST-pulldown.** **(A)** Input proteins of GST protein, GST-tagged *MjRPS27* and His-tagged VP26 analyzed by SDS-PAGE. **(B)** GST-*MjRPS27* pulldown His-VP26 analyzed by western blot: **Left panel**, Pulldown proteins firstly separated by SDS-PAGE and electrotransferred onto a nitrocellulose membrane and analyzed by western blot using anti-GST as primary antibody; **Right panel**, The SDS-PAGE separated proteins were transferred onto the nitrocellulose membrane and analyzed by western blot using anti-His as primary antibody. **(C)** GST pulldown His-VP26 analyzed by SDS-PAGE (control): **Left panel**, western blot analysis with anti-GST; **Right panel**, western blot analysis with anti-His.

Table S1 Primers used in the study

| Primer                 | 5'– 3' sequence                             |
|------------------------|---------------------------------------------|
| <i>Mj</i> RPS27 RNAiF  | GCGTAATACGACTCACTATAGGATTTGATGACAGACCACTTC  |
| <i>Mj</i> RPS27 RNAiR  | GCGTAATACGACTCACTATAGGATCCATTTGCCACTTTAC    |
| GFP RNAiF              | GCGTAATACGACTCACTATAGGTGGTCCCAATTCTCGTGGAAC |
| GFP RNAiR              | GCGTAATACGACTCACTATAGGCTTGAAGTTGACCTTGATGCC |
| <i>Mj</i> Dorsal RTF   | GCAATGCTGGTAACCTGGCTA                       |
| <i>Mj</i> Dorsal RTR   | CTATGGATTTTGGTCAATACACTTT                   |
| <i>Mj</i> Relish RTF   | CAGATAGATTCTGTGCGTTGC                       |
| <i>Mj</i> Relish RTR   | CGAGGTGGATTTCCGTTGTGT                       |
| <i>Mj</i> ALFB1 RTF    | CGGTGGTGGCCCTGGTGGCACTCTTGG                 |
| <i>Mj</i> ALFB1 RTR    | GACTGGCTGCGTGTGCTGGCTTCCCCTC                |
| <i>Mj</i> RPS28RT-F    | ATGGACAAGCCAGTAAAGC                         |
| <i>Mj</i> RPS28RT-R    | ATTGCGGATAATTGAACG                          |
| <i>Mj</i> FOXO-RT-F    | TTGCACCTTGATTTCCGTAG                        |
| <i>Mj</i> FOXO-RT-R    | CACTTGTGGAGTCTTTCCGTAG                      |
| <i>Mj</i> Rab5-RT-F    | ATTTGAGATTTGGGACACGG                        |
| <i>Mj</i> Rab5-RT-R    | ATAGGTCTGGGCCTCTTCAT                        |
| <i>Mj</i> Rab7-RT-F    | ATCGCGGAGCTGATTGTT                          |
| <i>Mj</i> Rab7-RT-R    | ACTGTTGTGCTCGCTTCGTC                        |
| <i>Mj</i> AKT-RT-F     | GTTGACTGGTGGGGTTATGGA                       |
| <i>Mj</i> AKT-RT-R     | GGTGATGTAGAAGGGGTGATT                       |
| <i>Mj</i> MthGPCR-RT-F | CTCATGGGAGTCACCTGG                          |
| <i>Mj</i> MthGPCR-RT-R | CCTCGGCGTTCTCGTAG                           |

## References

- Xu JD, Jiang HS, Wei TD, Zhang KY, Wang XW, et al. (2017) Interaction of the Small GTPase Cdc42 with Arginine Kinase Restricts White Spot Syndrome Virus in Shrimp. *J Virol* 91. pii: e01916-16. doi: 10.1128/JVI.01916-16.
- Sun JJ, Lan JF, Zhao XF, Vasta GR, Wang JX (2017) Binding of a C-type lectin's coiled-coil domain to the Domeless receptor directly activates the JAK/STAT pathway in the shrimp immune response to bacterial infection. *PLoS Pathog* 13: e1006626. doi: 10.1371/journal.ppat.1006626.
